# Supplementary material for: IFN-λ prevents influenza virus spread from the upper airways to the lungs and limits virus transmission
Source: eLife journal article supplement (doi:10.7554/elife.33354), 2018-04-13
Supplement: figures [file elife-33354-figures-v2.pdf]

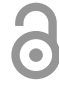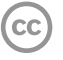

---

## Figures and figure supplements

IFN- $\lambda$  prevents influenza virus spread from the upper airways to the lungs and limits virus transmission

**Jonas Klinkhammer *et al***

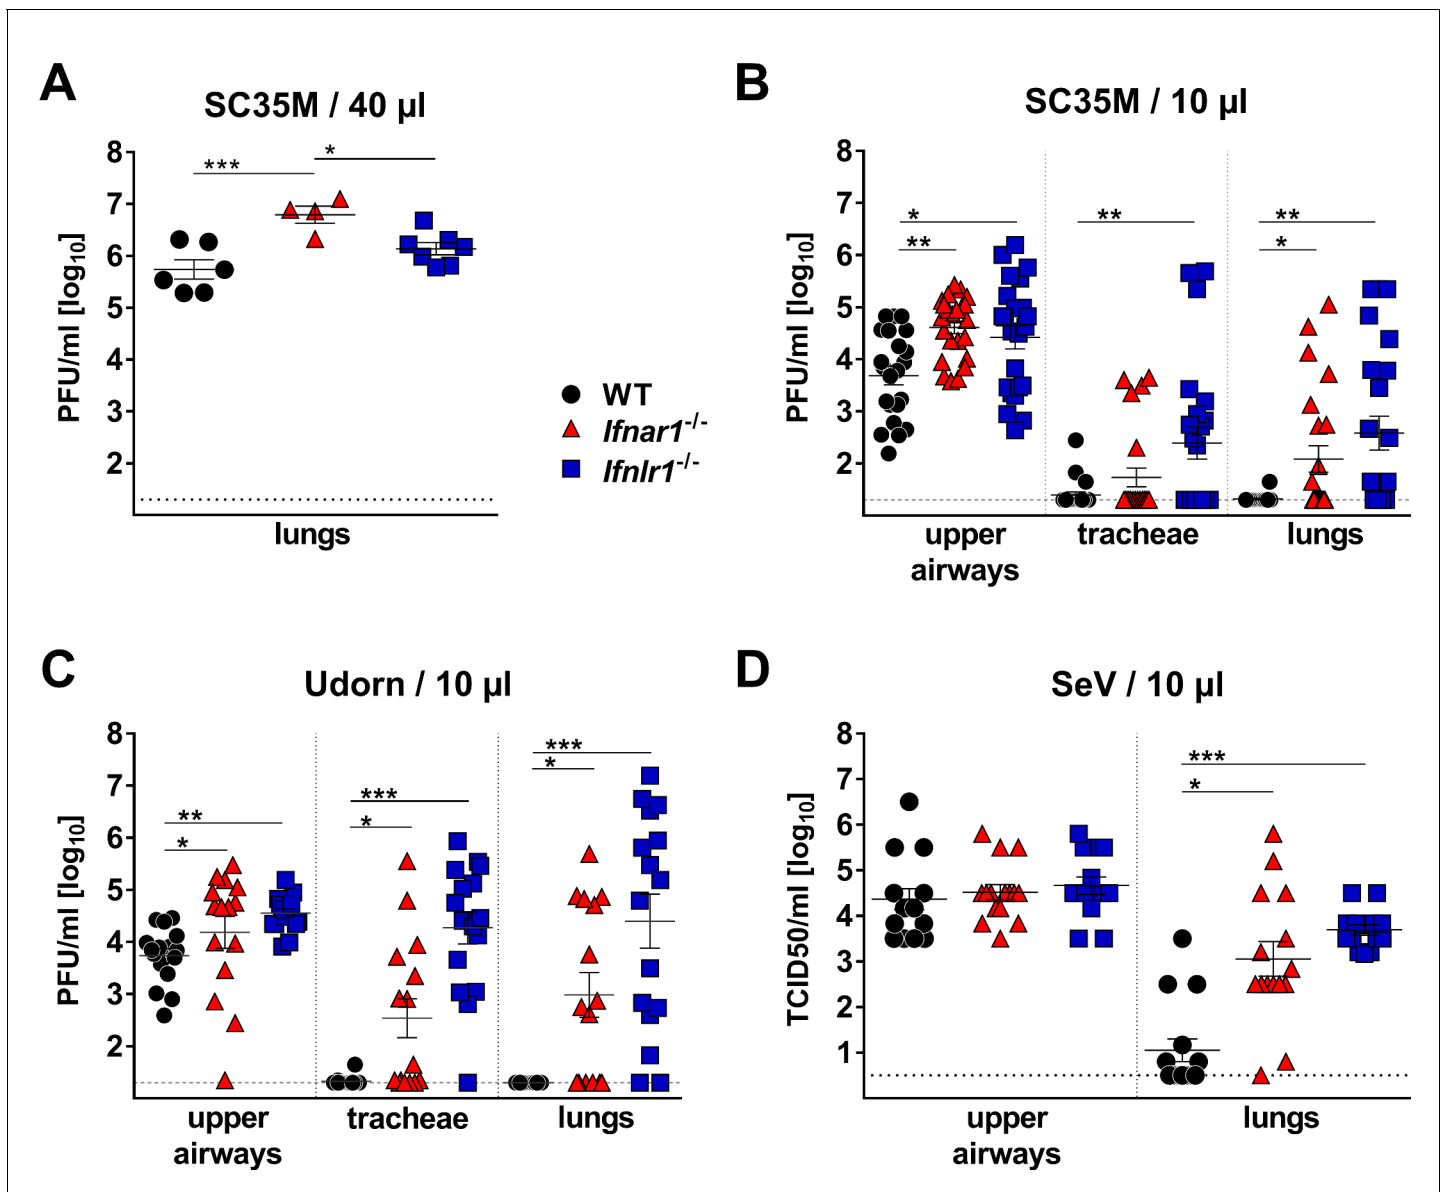

**Figure 1.** IFN- $\lambda$  prevents virus spread from the upper airways to the lungs of mice. (A) Standard intranasal delivery of virus inoculum: WT ( $n = 6$ ), *Ifnar1*<sup>-/-</sup> ( $n = 4$ ) and *Ifnlr1*<sup>-/-</sup> ( $n = 7$ ) mice were intranasally infected with  $10^4$  PFU of SC35M in a volume of 40  $\mu$ l, and viral titers in the lungs were determined on day three post infection by plaque assay. (B–D) Selective virus delivery to the upper respiratory tract: (B) WT ( $n = 22$ ), *Ifnar1*<sup>-/-</sup> ( $n = 23$ ) and *Ifnlr1*<sup>-/-</sup> ( $n = 23$ ) mice were intranasally infected with  $10^4$  PFU of SC35M in a volume of 10  $\mu$ l. Mice were sacrificed on day five post infection, and viral titers in the upper airways, tracheae and lungs were determined by plaque assay. Pooled results from three independent experiments are shown. (C) WT ( $n = 16$ ), *Ifnar1*<sup>-/-</sup> ( $n = 15$ ) and *Ifnlr1*<sup>-/-</sup> ( $n = 16$ ) mice were intranasally infected with  $5 \times 10^3$  PFU of Udorn in a volume of 10  $\mu$ l. Mice were sacrificed on day five post infection, and viral titers in the upper airways, tracheae and lungs were determined by plaque assay. Pooled results from two independent experiments are shown. (D) WT ( $n = 15$ ), *Ifnar1*<sup>-/-</sup> ( $n = 15$ ) and *Ifnlr1*<sup>-/-</sup> ( $n = 15$ ) mice were intranasally infected with  $10^3$  TCID<sub>50</sub> of SeV in a volume of 10  $\mu$ l. Mice were sacrificed on day five post infection, and viral titers in the upper airways and lungs were determined by the TCID<sub>50</sub> method. Pooled results from two independent experiments are shown. Symbols represent individual mice, and bars represent means  $\pm$  SEM. Statistical analysis: One-way ANOVA with Tukey's multiple comparisons was used to compare viral titers in the upper airways: asterisks indicate p-values: \*\*\* $p < 0.001$ , \*\* $p < 0.01$ , \* $p < 0.05$ . Fisher's exact test was used to compare events of virus spread: circles indicate p-values: \*\*\* $p < 0.001$ , ° $p < 0.01$ , °° $p < 0.05$ .

DOI: <https://doi.org/10.7554/eLife.33354.003>

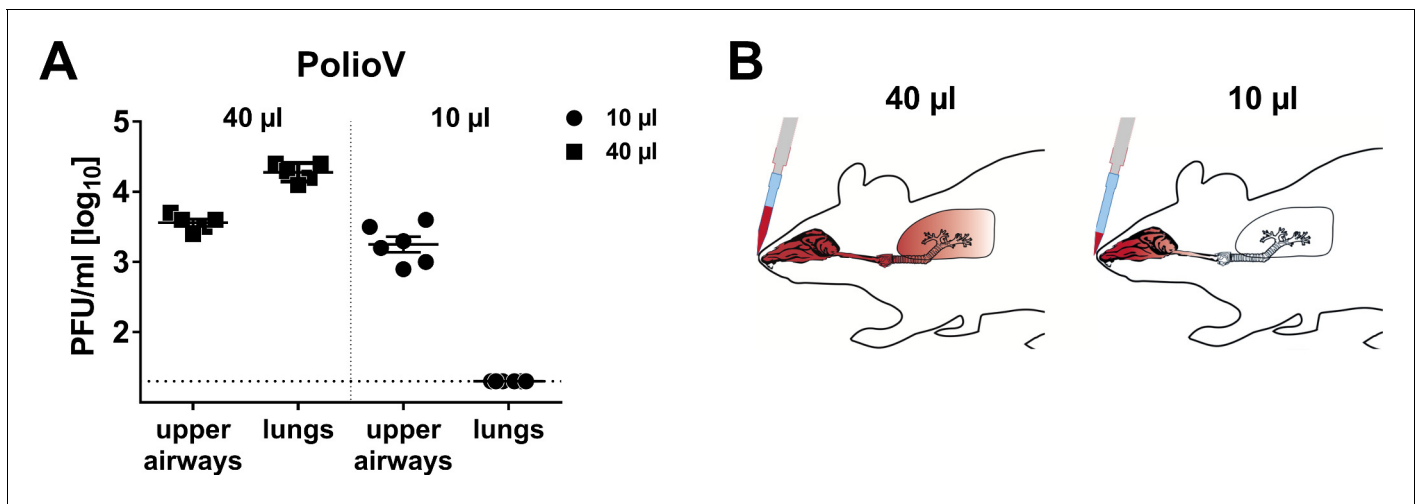

**Figure 1—figure supplement 1.** Selective infection of the upper respiratory tract can be achieved by applying the virus inoculum in a small volume. (A) 10 µl or 40 µl of inoculum containing  $10^6$  PFU/ml of poliovirus were administered intranasally to the airways of mice. 5 min after virus administration, the animals were sacrificed, and viral titers in tissue homogenates of the upper airways and lungs were determined by plaque assay. Symbols represent individual mice, and bars represent means  $\pm$  SEM. (B) Schematic depicting the interdependence of inoculum size and virus delivery to distinct parts of the respiratory tract.

DOI: <https://doi.org/10.7554/eLife.33354.004>

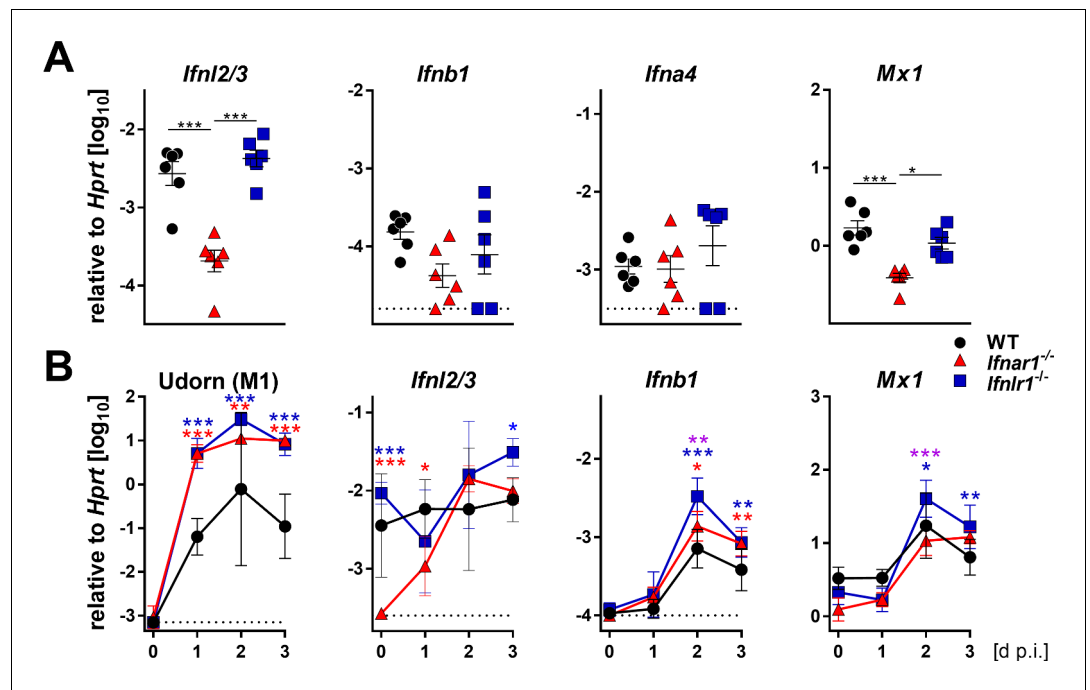

**Figure 2.** Basal expression of IFN-λ genes is reduced in *Ifnar1*<sup>-/-</sup> mice. (A) Basal expression of type I (*Ifnb1* and *Ifna4*), type III IFNs (*Ifnl2/3*) and *Mx1* was measured by RT-qPCR in snout homogenates of WT (n = 6), *Ifnar1*<sup>-/-</sup> (n = 6) and *Ifnlr1*<sup>-/-</sup> (n = 6). Gene expression levels are shown relative to the housekeeping gene *Hprt*. Symbols represent individual mice, and bars represent means ± SEM. Statistical analysis: One-way ANOVA with Tukey's multiple comparisons; asterisks indicate p-values: \*\*\*p < 0.001, \*p < 0.05. (B) WT (n = 21), *Ifnar1*<sup>-/-</sup> (n = 22) and *Ifnlr1*<sup>-/-</sup> (n = 23) mice were intranasally infected with 10<sup>4</sup> PFU of Udorn in a volume of 10 μl. Mice were sacrificed at the indicated time points (n = 5–7) and snout homogenates were processed for RT-qPCR. Expression levels of mRNAs encoding viral M1 protein or cellular gene products IFN-λ2/3, IFN-β and *Mx1* are shown relative to transcription of the *Hprt* housekeeping gene. Symbols represent means ± SD. Red or blue asterisks indicate statistically significant differences between WT and *Ifnar1*<sup>-/-</sup> or *Ifnlr1*<sup>-/-</sup>, respectively; purple asterisks indicate differences between *Ifnar1*<sup>-/-</sup> and *Ifnlr1*<sup>-/-</sup>. Statistical analysis: Two-way ANOVA; asterisks indicate p-values: \*\*\*p < 0.001, \*\*p < 0.01, \*p < 0.05.

DOI: <https://doi.org/10.7554/eLife.33354.005>

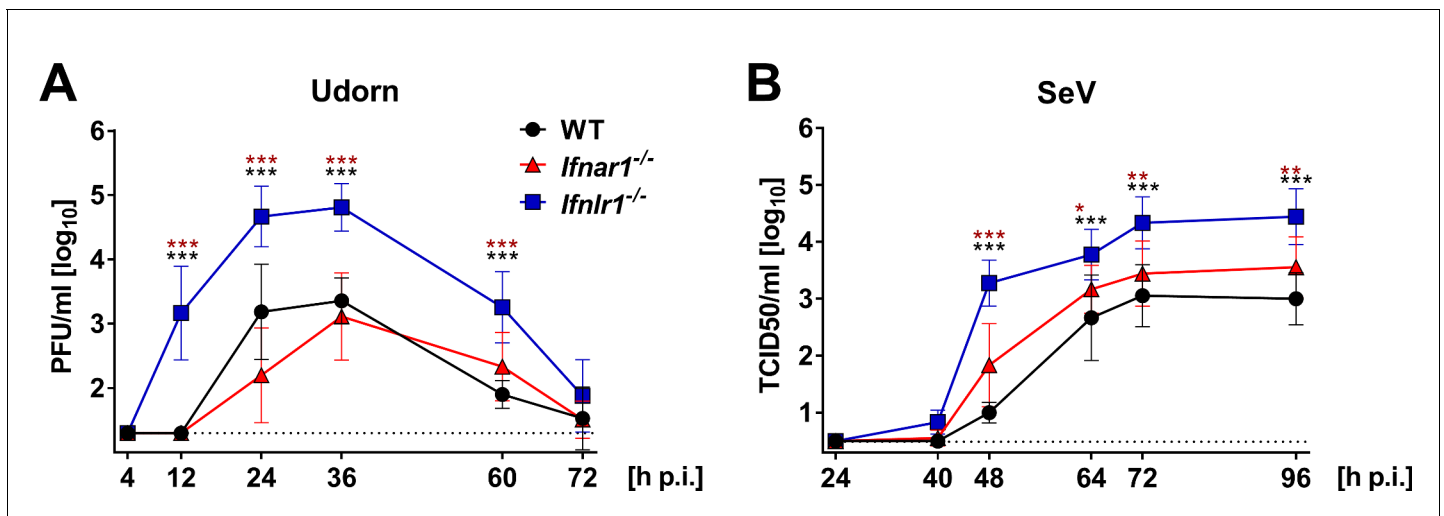

**Figure 3.** *Ifnlr1*<sup>-/-</sup> mice secrete high amounts of infectious virus. (A) WT (n = 7), *Ifnar1*<sup>-/-</sup> (n = 9) and *Ifnlr1*<sup>-/-</sup> (n = 9) mice were intranasally infected with 10<sup>5</sup> PFU of Udorn in a volume of 10  $\mu$ l. (B) WT (n = 6), *Ifnar1*<sup>-/-</sup> (n = 6) and *Ifnlr1*<sup>-/-</sup> (n = 6) mice were intranasally infected with 10<sup>3</sup> TCID<sub>50</sub> of SeV in a 10  $\mu$ l volume. Nasal swabs were taken at the indicated time points post infection. Infectious virus recovered from the swabs was quantified by plaque assay (Udorn) or the TCID<sub>50</sub> method (SeV). Symbols represent means  $\pm$ SD. Statistical analysis: Two-way ANOVA; black asterisks indicate significant differences between WT and *Ifnlr1*<sup>-/-</sup>, red asterisks indicate significant differences between *Ifnar1*<sup>-/-</sup> and *Ifnlr1*<sup>-/-</sup>. P-values: \*\*\*p<0.001, \*\*p<0.01, \*p<0.05.

DOI: <https://doi.org/10.7554/eLife.33354.006>

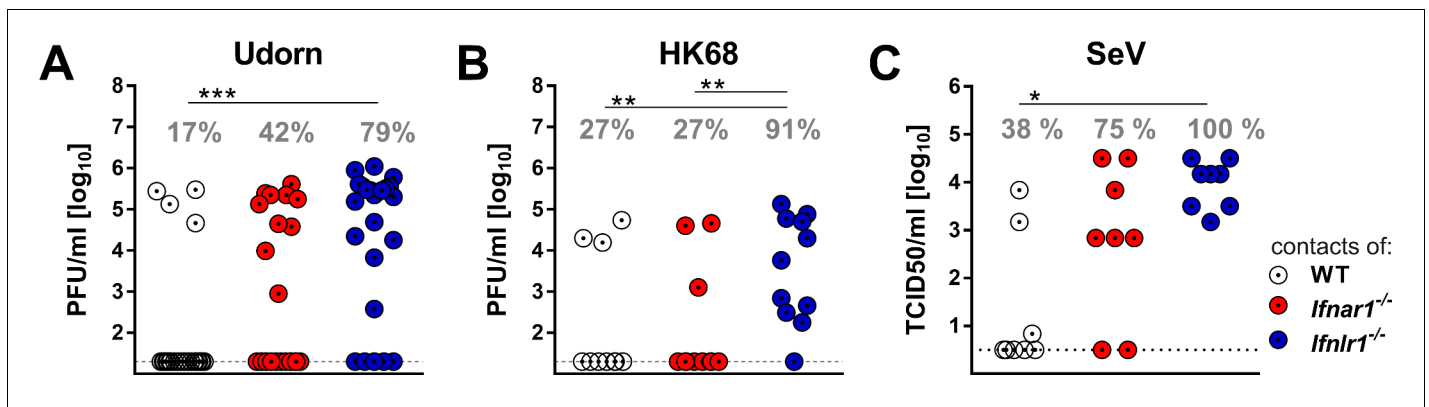

**Figure 4.** IFN- $\lambda$  limits contact transmission of respiratory viruses among mice. WT, *Ifnar1*<sup>-/-</sup> and *Ifnlr1*<sup>-/-</sup> mice were intranasally infected with (A) 10<sup>5</sup> PFU of Udon, (B) 10<sup>5</sup> PFU of HK68 or (C) 10<sup>3</sup> TCID<sub>50</sub> of SeV in a volume of 10  $\mu$ l. At 24 hr post infection, the infected mice were cohoused with naive *Ifnar1*<sup>-/-</sup>/*Ifnlr1*<sup>-/-</sup> contact mice for 4 days (Udon and HK68) or 6 days (SeV). Viral titers in the upper airways of individual contact mice are plotted, and calculated rates of successful virus transmission are indicated. Statistical analysis: Fisher's exact test; asterisks indicate p-values: \*\*\*p<0.001, \*\*p<0.01, \*p<0.05.

DOI: <https://doi.org/10.7554/eLife.33354.007>

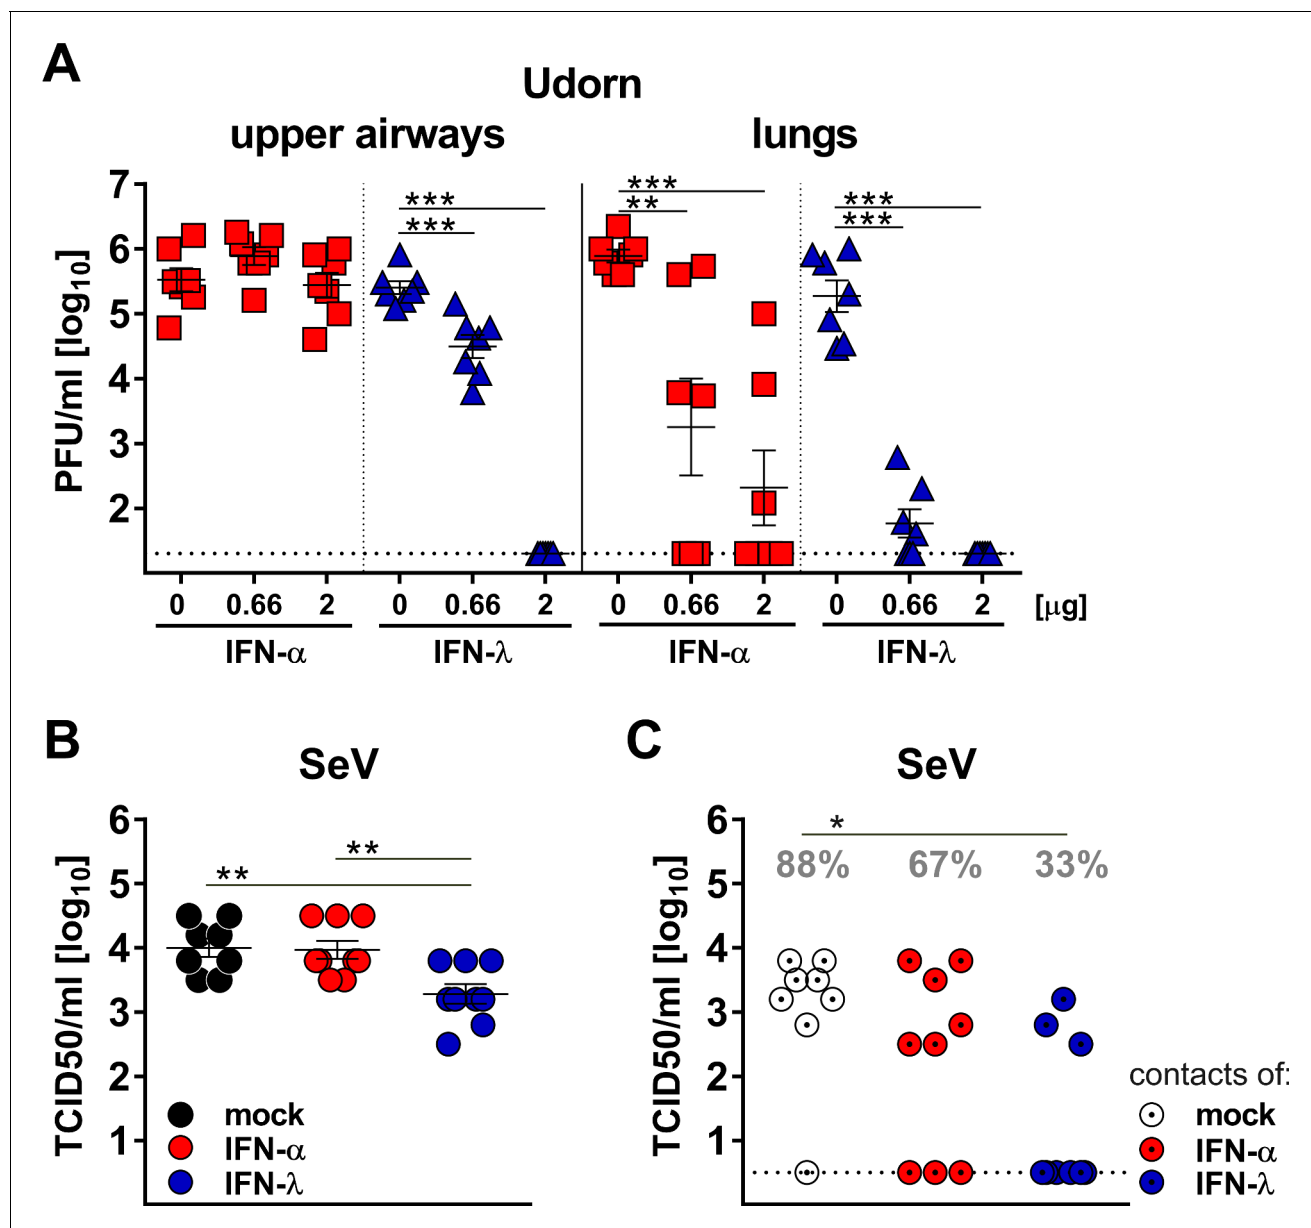

**Figure 5.** Virus defense in the upper respiratory tract strongly relies on IFN- $\lambda$ . (A) Groups ( $n = 7$ ) of *Ifnar1*<sup>-/-</sup> (blue triangles) and *Ifnlr1*<sup>-/-</sup> mice (red squares) were intranasally treated with 40  $\mu$ l of saline solution (mock) or with two different doses of IFN- $\alpha$  or IFN- $\lambda$  as indicated. After 18 hr, the mice were infected with 10<sup>5</sup> PFU of Udorn in a 40  $\mu$ l volume. On day three post infection, viral loads in the upper airways and lungs were determined by plaque assay. (B–C) Groups of WT mice ( $n = 8$ –9) were treated intranasally with 20  $\mu$ l containing saline (mock), 3  $\mu$ g of IFN- $\alpha$  or 3  $\mu$ g of IFN- $\lambda$ . After 18 hr, the mice were infected intranasally with 10<sup>4</sup> TCID<sub>50</sub> of SeV in a volume of 10  $\mu$ l. At 24 hr post infection, infected mice were cohoused with naive *Ifnar1*<sup>-/-</sup>/*Ifnlr1*<sup>-/-</sup> contact mice. On day five post cohousing, all animals were sacrificed and virus titers in the upper airways of directly infected mice (panel B) and contact mice (panel C) were determined by the TCID<sub>50</sub> method. Grey numbers indicate the calculated frequency of successful virus transmission. Statistical analysis: (A–B) One-way ANOVA with Tukey's multiple comparisons; (C) Fisher's exact test. Asterisks indicate p-values: \*\*\* $p < 0.001$ , \*\* $p < 0.01$ , \* $p < 0.05$ . Symbols represent values of individual mice, and bars represent means  $\pm$  SEM.

DOI: <https://doi.org/10.7554/eLife.33354.008>

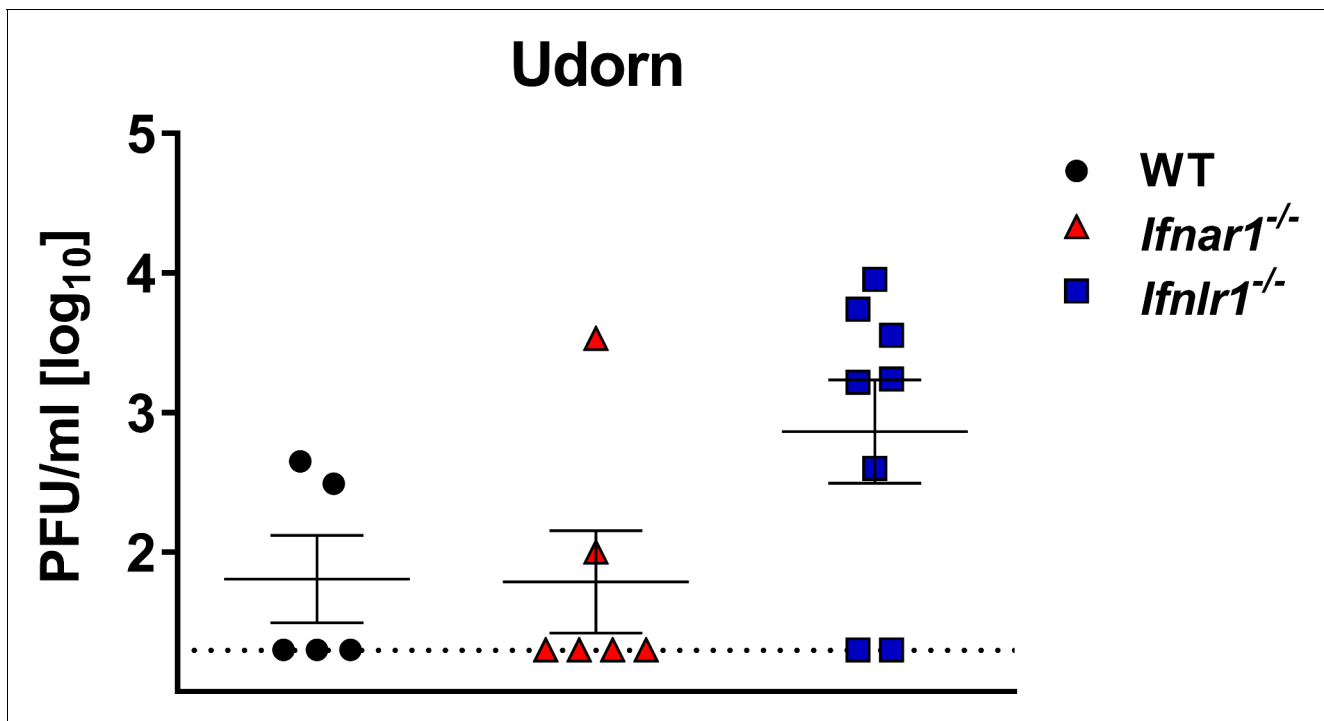

**Figure 5—figure supplement 1.** IFN- $\lambda$  efficiently inhibits influenza virus replication in the upper airways under low dose infection conditions. WT ( $n = 5$ ), *Ifnar1*<sup>-/-</sup> ( $n = 6$ ) and *Ifnlr1*<sup>-/-</sup> ( $n = 8$ ) mice were intranasally infected with 100 PFU of Udorn in a 10  $\mu$ l volume. Upper airways were collected on day five post infection, and viral loads were determined by plaque assay. Symbols represent individual mice, and bars represent means  $\pm$  SEM. DOI: <https://doi.org/10.7554/eLife.33354.009>



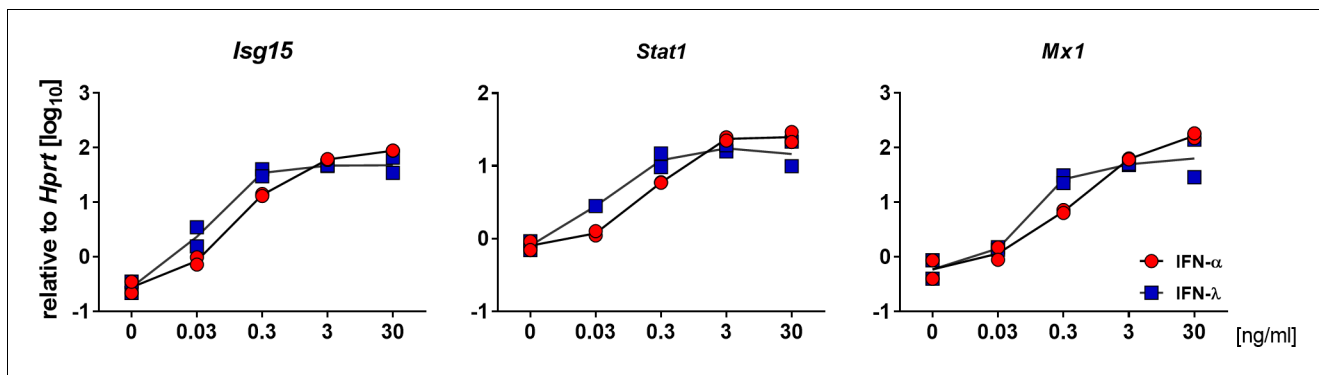

**Figure 5—figure supplement 2.** IFN- $\lambda$  and IFN- $\alpha$  have comparable potency on primary airway epithelial cells. The biological activities of IFN- $\alpha$  and mouse IFN- $\lambda$  preparations were determined by stimulating primary AEC cultures for 4 hr with the indicated concentrations of these cytokines. Induction of the IFN-stimulated genes *Isg15*, *Stat1* and *Mx1* was assessed by RT-qPCR; values are represented as gene expression levels relative to *Hprt*. Representative data of two independent experiments is shown.

DOI: <https://doi.org/10.7554/eLife.33354.010>

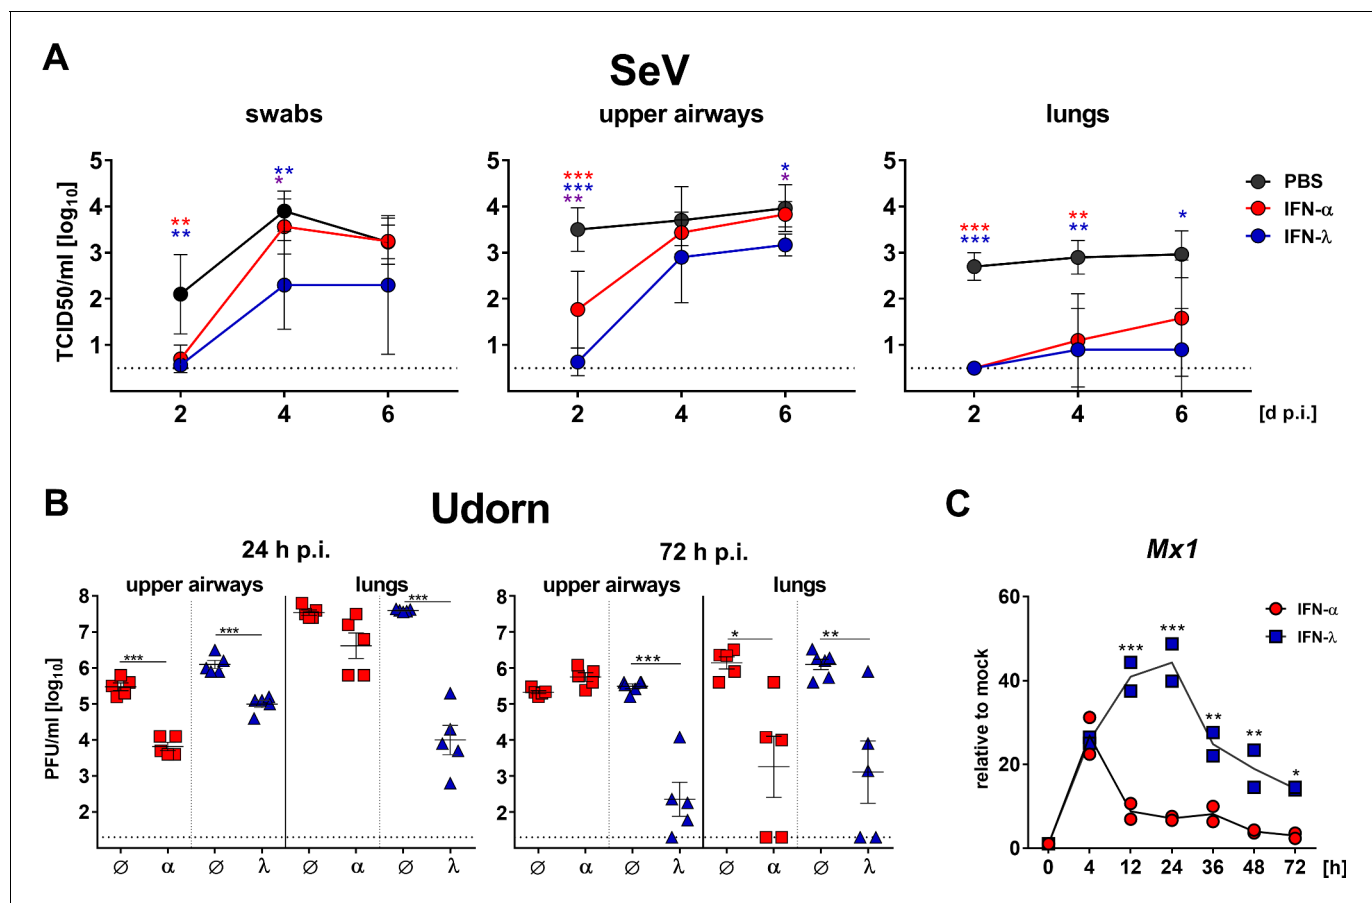

**Figure 6.** IFN-λ but not IFN-α confers long-lasting antiviral protection in the upper airways. (A) WT mice ( $n = 4-5$ ) were treated by the subcutaneous route with 3  $\mu$ g IFN-α, 3  $\mu$ g IFN-λ or saline solution 18 hr before intranasal challenge with  $10^3$  TCID<sub>50</sub> of SeV in a 40  $\mu$ l volume. Groups of mice were sacrificed on days 2, 4 or 6 post infection (dp.i.), and viral titers in nasal swabs (left panel), upper airways (middle panel) and lungs (right panel) were determined by the TCID<sub>50</sub> method. Symbols represent means  $\pm$ SD. Red or blue asterisks indicate statistically significant differences between mock and IFN-α- or IFN-λ-treated groups, respectively; purple asterisks indicate differences between IFN-α- or IFN-λ-treated groups. Statistical analysis: One-way ANOVA with Tukey's multiple comparisons; p-values: \*\*\* $p < 0.001$ , \*\* $p < 0.01$ , \* $p < 0.05$ . (B) *Ifnar1*<sup>-/-</sup> (blue triangles,  $n = 5-6$ ) or *Ifnlr1*<sup>-/-</sup> mice (red squares,  $n = 5$ ) were treated by the intranasal route with 2  $\mu$ g IFN-λ or 2  $\mu$ g IFN-α, respectively, before intranasal challenge with  $4 \times 10^5$  PFU of Udorn in a 40  $\mu$ l volume. Mice treated with saline (Ø) served as controls. Mice were sacrificed at 24 hr (left panel) or 72 hr (right panel) post infection (p.i.), and viral titers in the upper airways and lungs were determined by plaque assay. Symbols represent individual mice, and bars represent means  $\pm$  SEM. Statistical analysis: One-way ANOVA with Tukey's multiple comparisons; p-values: \*\*\* $p < 0.001$ , \*\* $p < 0.01$ , \* $p < 0.05$ . (C) IFN-mediated induction of *Mx1* was determined by stimulating differentiated primary airway epithelial cells derived from mouse tracheae for the indicated time points with 1 ng/ml of either IFN-α or IFN-λ. *Mx1* induction was assessed by RT-qPCR; values are represented as gene expression levels relative to unstimulated controls (mock). Symbols represent single wells; line indicates mean. Representative data of two independent experiments is shown. Statistical analysis: Two-way ANOVA; asterisks indicate significant differences between IFN-α- and IFN-λ-treated cells. P-values: \*\*\* $p < 0.001$ , \*\* $p < 0.01$ , \* $p < 0.05$ .

DOI: <https://doi.org/10.7554/eLife.33354.011>

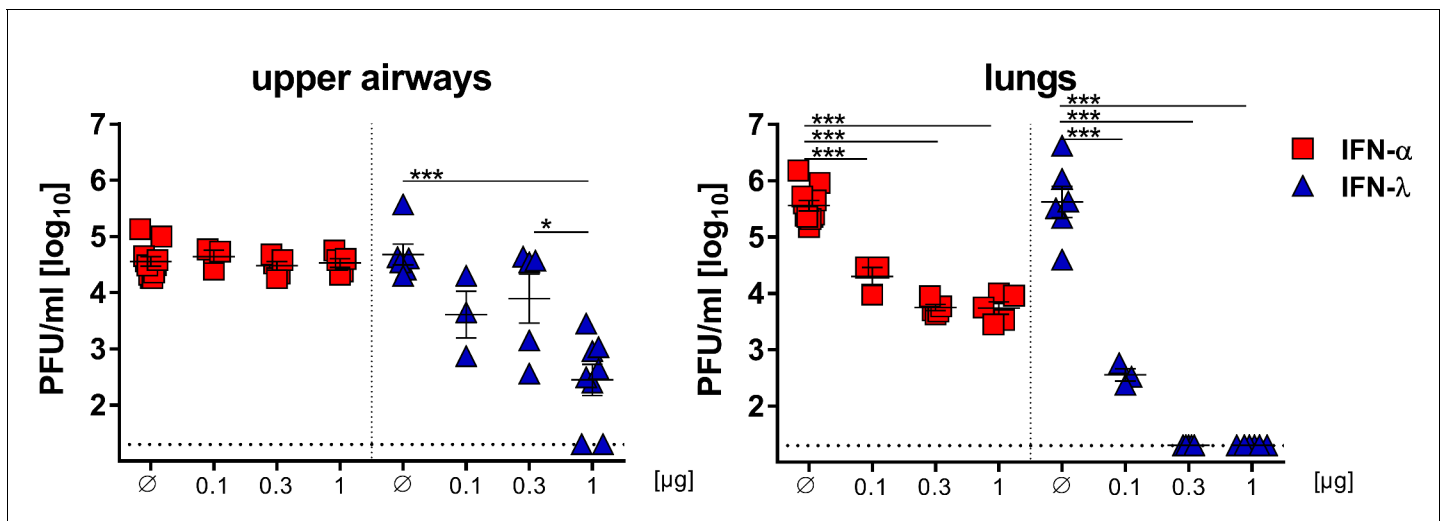

**Figure 6—figure supplement 1.** IFN-λ but not IFN-α confers antiviral protection in the upper airways. *Ifnar1*<sup>-/-</sup> (blue triangles) or *Ifnlr1*<sup>-/-</sup> mice (red squares) were treated subcutaneously with the indicated amounts of IFN-λ or IFN-α, respectively. 18 hr later, the animals were infected intranasally with 10<sup>5</sup> PFU of Udorn in a 40 μl volume. Mice treated with saline (Ø) served as controls. Animals were sacrificed 3 days post infection, and viral titers in upper airways (left panel) and lungs (right panel) were determined by plaque assay. Symbols represent individual mice, and bars represent means ± SEM. Statistical analysis: One-way ANOVA with Tukey's multiple comparison test; p-values: \*\*\*p<0.001, \*\*p<0.01, \*p<0.05.

DOI: <https://doi.org/10.7554/eLife.33354.012>

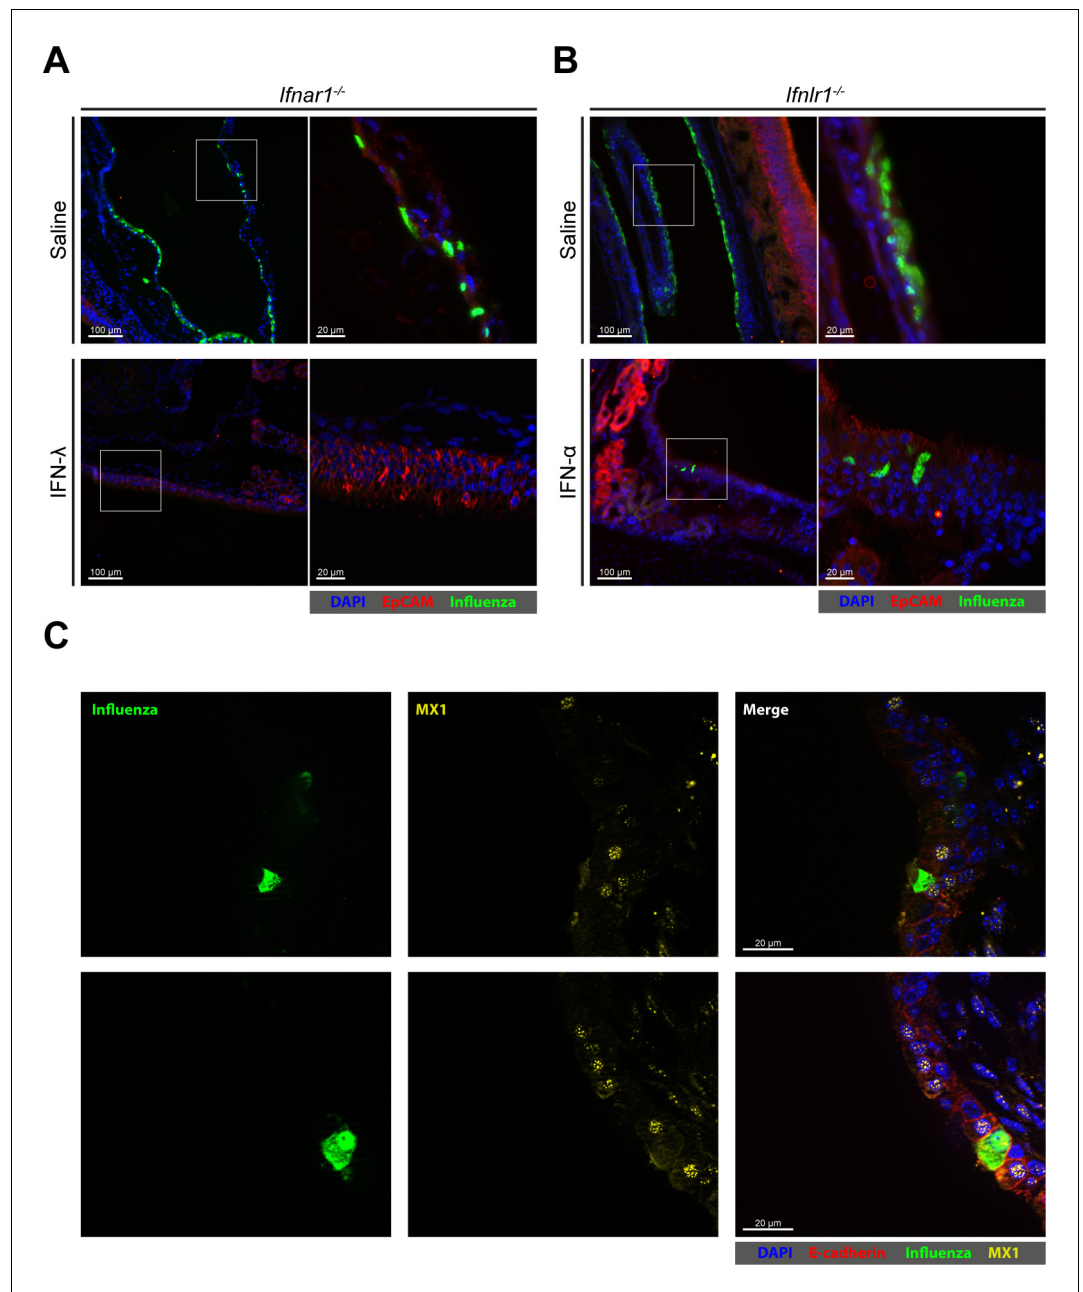

**Figure 7.** Few epithelial cells in upper airways of IFN- $\alpha$ -treated mice remain susceptible to viral infection. (A) *Ifnar1*<sup>-/-</sup> and (B) *Ifnar1*<sup>-/-</sup> mice were treated intranasally with either saline, 2  $\mu$ g IFN- $\lambda$  or 2  $\mu$ g IFN- $\alpha$  before infection with 10<sup>5</sup> PFU of Udorn. The animals were sacrificed at 24 hr post infection, and heads were processed for cryosections. Thin-sections were stained for EpCAM (red), influenza virus antigens (green) and DAPI (blue). Merged pictures are presented at low magnification (left panels), and boxed areas are shown at higher magnification (right panels). (C) WT mice were treated intranasally with 2  $\mu$ g IFN- $\alpha$  before infection with 10<sup>5</sup> PFU of Udorn. The animals were sacrificed at 24 hr post infection, and heads were processed for cryosections. Thin-sections were stained for E-cadherin (red), influenza virus antigens (green), MX1 (yellow) and DAPI (blue). Single staining for virus antigen (left panels) and MX1 (middle panels) as well as merged pictures of the same fields (right panels) are shown.

DOI: <https://doi.org/10.7554/eLife.33354.013>

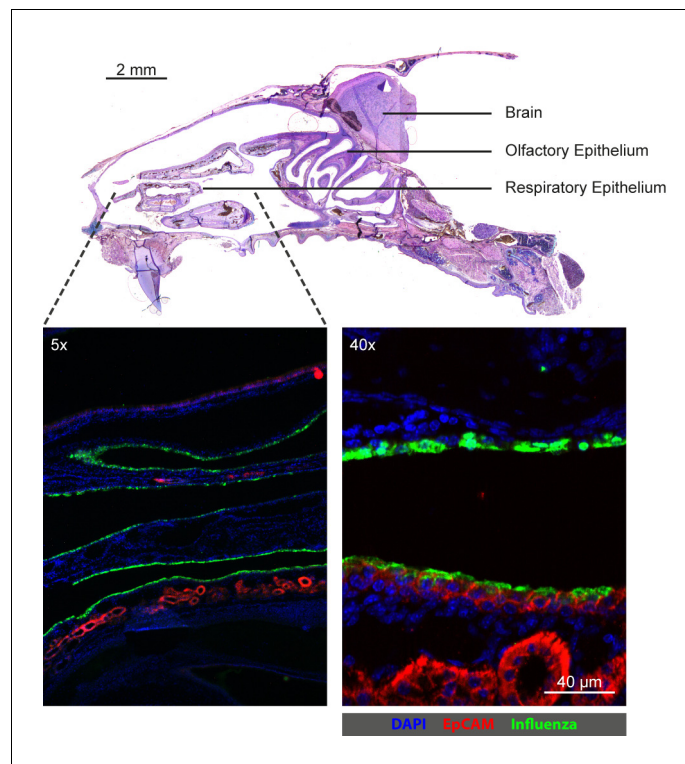

**Figure 7—figure supplement 1.** Udorn replicates preferentially in the rostral naso- and maxilla-turbinates. *Ifnar1*<sup>−/−</sup> *Ifnlr1*<sup>−/−</sup> mice were intranasally infected with 10<sup>5</sup> PFU of Udorn and sacrificed 24 h later. Heads of animals were collected, processed for cryosections and subjected to Periodic acid–Schiff staining (top panel) or immune-stained (bottom panels) for EpCAM (red), influenza virus antigen (green) and DAPI (blue).

DOI: <https://doi.org/10.7554/eLife.33354.014>
